# Supplementary material for: The SPARC complex defines RNAPII promoters in Trypanosoma brucei
Source: eLife. 2022 Sep 28;11:e83135. doi: 10.7554/eLife.83135 (PMC9566855; doi:10.7554/eLife.83135)
Supplement: Supplementary file 4. — Upper case sequences align to T. brucei DNA. Lower case sequences align to pPOT plasmid DNA except for the sgRNA oligos targeting the JBP2 gene (see the "Notes" column for these oligos). "F" denotes a forward primer and "R" denotes a reverse primer. [file elife-83135-supp4.xlsx]

## Sheet: Supplementary file 4
Supplementary file 4. Oligos used in this study
Upper case sequences align to T. brucei DNA. Lower case sequences align to pPOT plasmid DNA except for the sgRNA oligos targeting the JBP2 gene (see the "Notes" column for these oligos).
"F" denotes a forward primer and "R" denotes a reverse primer.
Oligo description	Sequence	Notes
Tag CSD1; CDS fragment amplification F	ggatcaggatcgggtagtATGAACGAGCCTGATGCCAT
Tag CSD1; CDS fragment amplification R	CAAATAGTCAATGAGCACCTGTGG
Tag CSD1; 5′UTR fragment amplification F	CTGAAGCGTATGGAGACTGGC
Tag CSD1; 5′UTR fragment amplification R	gcagcaggtctgcattatacCACTTTGCCCTTCAATACACCTATAC
Tag PHD6; CDS fragment amplification F	ggatcaggatcgggtagtATGGATCCGGCGGTAGGG
Tag PHD6; CDS fragment amplification R	ACAGCAAGCGGGTTCCATG
Tag PHD6; 5′UTR fragment amplification F	AGTCGTTTAGATGCTTGCGTTG
Tag PHD6; 5′UTR fragment amplification R	gcagcaggtctgcattatacATGTTGAAGGGAGAAAGTCTACGAT
Tag PBP1; CDS fragment amplification F	ggatcaggatcgggtagtATGGTAGGAGGATATTTACGTATGC
Tag PBP1; CDS fragment amplification R	GTGATCAACAACACATACGGATG
Tag PBP1; 5′UTR fragment amplification F	TGTCACAGATGGCCCATG
Tag PBP1; 5′UTR fragment amplification R	gcagcaggtctgcattatacTCCCTATTATGCAATAAAGAGAAAGG
Tag PWWP1; CDS fragment amplification F	ggatcaggatcgggtagtATGGATTTAGGGGAAGATTCGAC
Tag PWWP1; CDS fragment amplification R	CTTCCTCGTTACCCACTTGC
Tag PWWP1; 5′UTR fragment amplification F	TCTCCGTTGTTGGCAACC
Tag PWWP1; 5′UTR fragment amplification R	gcagcaggtctgcattatacCACTAATACCTTCTTCACCAGTTAC
Tag JBP2 (Q57X81); CDS fragment amplification F	ggatcaggatcgggtagtATGCCTATGTTTATGGATGGGGC
Tag JBP2 (Q57X81); CDS fragment amplification R	GAAGCCTCTGTGTGAGAGCA
Tag JBP2 (Q57X81); 5′UTR fragment amplification F	AGGACACACACGAAACCGAT
Tag JBP2 (Q57X81); 5′UTR fragment amplification R	gcagcaggtctgcattatacTGCCGTAACTGGTAGCGTAAAG
SET27 KO by HR; 5′UTR fragment amplification F	TCTCGACTATGCGGTTCGTG
SET27 KO by HR; 5′UTR fragment amplification R	gcagcaggtctgcattatacTCCACACGAGGAAACACTGC
SET27 KO by HR; 3′UTR fragment amplification F	gattcgagccccacgcgtTAATAGTGCAAAATGGTGGGCG
SET27 KO by HR; 3′UTR fragment amplification F	TAGGTGTTGCCGTTGATGCC
JBP2 KO by CRISPR/Cas9 upstream sgRNA primer	gaaattaatacgactcactataggAAGGAAAGAGTGAACGTCAGgttttagagctagaaatagc	gaaattaatacgactcactatagg - T7 RNAP promoter; gttttagagctagaaatagc - Cas9 backbone start
JBP2 KO by CRISPR/Cas9 downstream sgRNA primer	gaaattaatacgactcactataggATTAAAAAATGAAAGGGTATgttttagagctagaaatagc
JBP2 KO by CRISPR/Cas9 repair cassette F	GTACGCAGATTCCTGCGGTCATTCTCGAGAgtataatgcagacctgctgc
JBP2 KO by CRISPR/Cas9 repair cassette R	CAGCTGTAGGGGTGATCACATGGAACAAATccggaaccactaccagaacc
qPCR: sTSS_10 F	TTTCCCGCCCGTAAGATTCG
qPCR: sTSS_10 R	GGTATTTTTCGCCGCATCCC
qPCR: sTSS_47 F	TGCCATAACTTTCGCCTCCC
qPCR: sTSS_47 R	AATAGGTTGGGAGCCGTTGC
qPCR: SET27 CDS F	ATGGATGTGCATTCCCCGTT
qPCR: SET27 CDS R	GACGGATCGAAGGCCAGAAA
qPCR: actin related protein 3 (Tb927.9.5350) F	CATCGCACGCAACATAGCAC
qPCR: actin related protein 3 (Tb927.9.5350) R	CCCTGTCTTCCTGTTCACCG
